# Supplementary material for: A liposome-based assay for cancer biomarker detection: exploring the correlation between platelet-derived microvesicles and NSCLC-associated miRNAs
Source: Royal Society of Chemistry journal article supplement (doi:10.1039/d4nr03704a), 2024-01-01
Supplement: d4nr03704a1.pdf [file d4nr03704a1.pdf]

1

2

3

4

5

6

7

8

9

10

11

# Supplementary Material

12

13 **Liposome-based assay for cancer biomarker detection: Exploring the**  
14 **correlation between platelet-derived microvesicles and NSCLC-associated**  
15 **miRNAs**

16 Mohamed Aimene Benariba<sup>a,b,1</sup>, Kanza Hannachi<sup>c,1</sup>, Sha Zhu<sup>d,\*</sup>, Yuting Zhang<sup>a</sup>, Xiaoli Wang<sup>a</sup>,  
17 Nandi Zhou<sup>a,\*</sup>

18 <sup>a</sup> School of Biotechnology and Key Laboratory of Carbohydrate Chemistry and Biotechnology of  
19 Ministry of Education, Jiangnan University, Wuxi 214122, China

20 <sup>b</sup> Bioengineering Laboratory, Ecole Nationale Supérieure de Biotechnologie, Ville Universitaire  
21 Ali Mendjeli, BP E66 25100, Constantine, Algeria

22 <sup>c</sup> State Key Laboratory of Food Science and Technology, School of Food Science and Technology,  
23 National Engineering Research Center for Functional Food, Jiangnan University, Wuxi 214122,  
24 China

25 <sup>d</sup> Department of Urology, the Wuxi No. 2 People's Hospital, Jiangnan University Medical Center,  
26 Wuxi 214002, China

27 <sup>1</sup> These authors contributed equally to this work

28 \* Corresponding authors. E-mail: nanyizhusha@126.com (S. Zhu); zhounandi@jiangnan.edu.cn  
29 (N. Zhou)

30

31 **Chemicals and reagents**

32 1,2-distearoyl-sn-glycero-3-phosphocholine (DSPC) ( $\geq 99.0\%$ ), Cholesterol ( $\geq 99.0\%$ ) and 5(6)-  
33 carboxyfluorescein ( $\geq 95.0\%$ ) were purchased from Sigma, China. Streptavidin-coated magnetic  
34 beads (MBs) were obtained from Thermo Fisher, China. Prostaglandin E1 (PGE1), protease, and  
35 phosphatase inhibitors were procured from Aladdin, China. The Anti-CD41a antibody labeled with  
36 FITC was sourced from Biolegend, China. Bovine serum albumin (BSA) was obtained from  
37 Sigma, China. Additionally, the SanPrep Column MicroRNA Mini-Prep Kit, MicroRNA First  
38 Strand cDNA Synthesis Kit, and MicroRNA qPCR Kit (SYBR Green Method) were acquired from  
39 Sangon Biotech, China. All other chemicals utilized in the experiment were analytical grade and  
40 were used without further purification. Throughout the experimental procedures, ultra-pure water  
41 with a resistivity of 18.2 M $\Omega$  cm, obtained from the microporous filtration system (Billerica,  
42 USA), was employed for the preparation of solutions.

43

44

45 **Table S1** Clinical characteristics of healthy donors and NSCLC patients.

| Characteristics    |                         | Healthy donors (N= 5) | NSCLC patients (N= 5) |
|--------------------|-------------------------|-----------------------|-----------------------|
| Average age (year) |                         | 61.34 ± 1.20          | 62.85 ± 1.04          |
| Sex (male)         |                         | 5                     | 5                     |
| NSCLC type         | Squamous cell carcinoma | /                     | 2                     |
|                    | Adenocarcinoma          | /                     | 2                     |
|                    | Large cell carcinoma    | /                     | 1                     |
| stage              |                         | /                     | (III-IV)              |

46

47

48

49 **Table S2** Oligonucleotide sequences.

| <b>Name</b> | <b>Sequence (5'→3')</b>                | <b>F-Primer</b>                      |
|-------------|----------------------------------------|--------------------------------------|
| miRNA-1246  | AAUGGAUUUUUGGAGCAGG                    | CGCAATGGATTTTTGGAGCAGG               |
| miRNA-21    | UAGCUUAUCAGACUGAUGUUGA                 | CGGTAGCTTATCAGACTGATGTTG             |
|             |                                        | A                                    |
| miRNA-223   | UGUCAGUUUGUCAAUACCCCA                  | CGCTGTCAGTTTGTCAAATACCCC             |
|             |                                        | A                                    |
| cDNA1       | Cholesteryl-<br>TTTTTTTTTTTTCAACATCAGT | //////////////////////////////////// |
| cDNA2       | CTGATAAGCTATT- Biotin                  | //////////////////////////////////// |

50

51

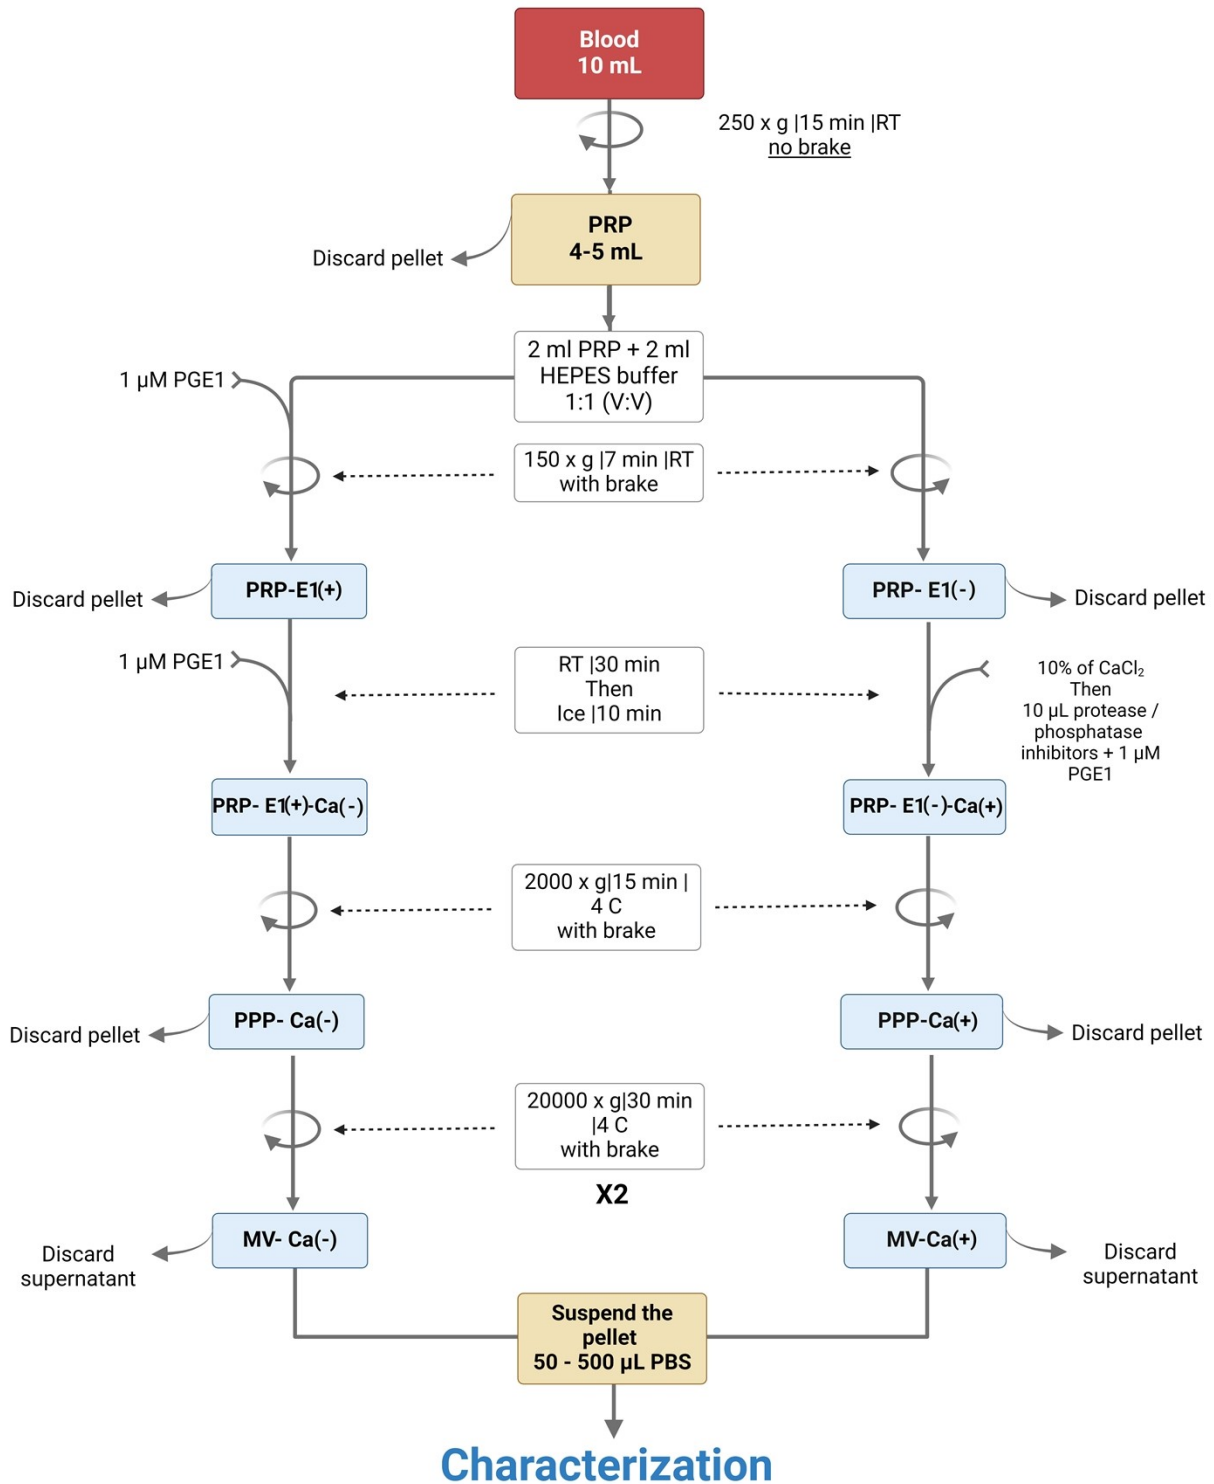

52

53 **Scheme S1.** Flowchart illustrating the process of sample preparation from whole human blood

54 collection until their analysis.

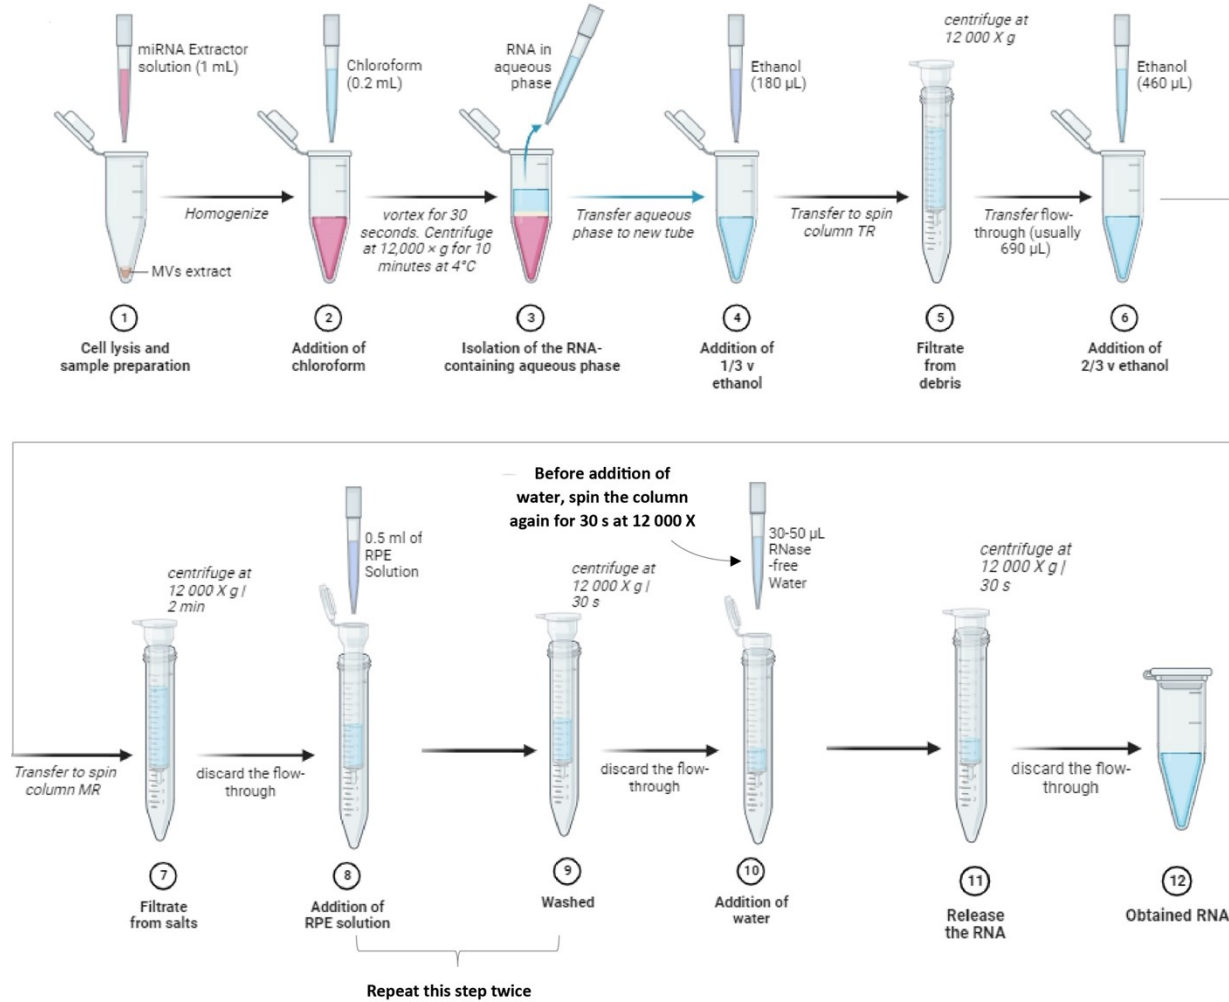

56

57 **Scheme S2.** Illustration of the miRNA extraction process following the manufacturer's protocol.

58

59

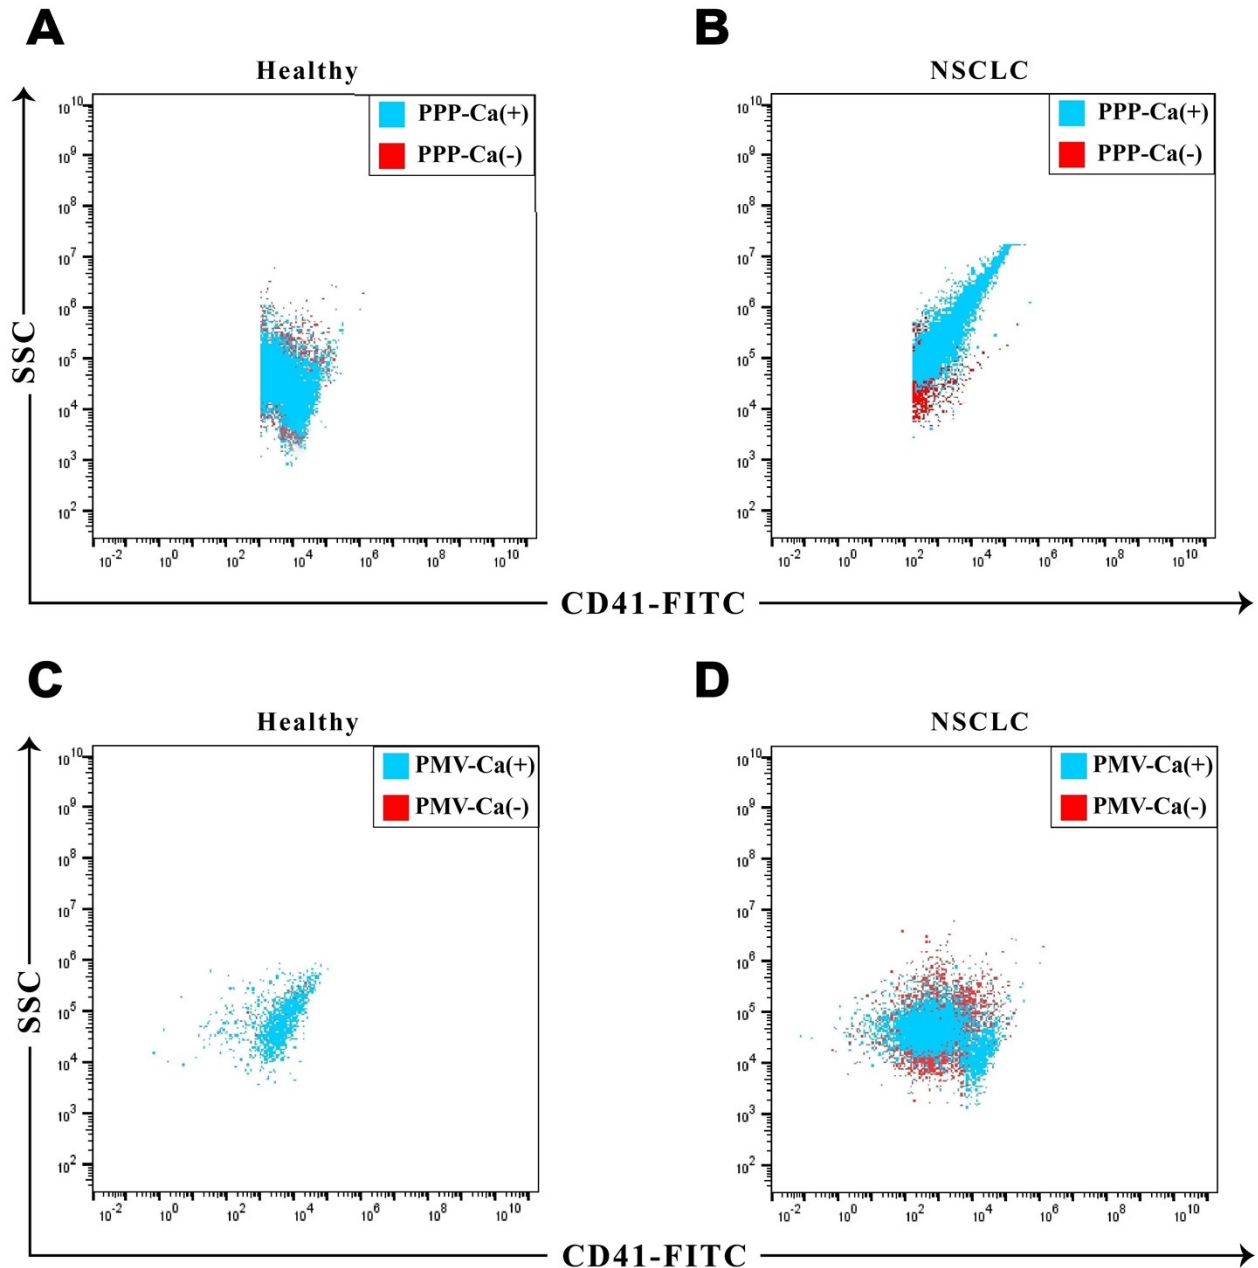

60

61 **Fig. S1** Platelet-poor plasma (PPP) from healthy donors (A) and patients with non-small cell lung

62 cancer (NSCLC) (B) before calcium activation (PPP-Ca(-)) overlaid with PPP after calcium

63 activation (PPP-Ca(+)). Platelet-derived microvesicles (PMVs) isolated from healthy donors (C)

64 and patients with non-small cell lung cancer (NSCLC) (D) before calcium activation (PMV-Ca(-)

65 )) overlaid with PMVs after calcium activation (PMV-Ca(+)). The data shown represent one of at

66 least three independent experiments.



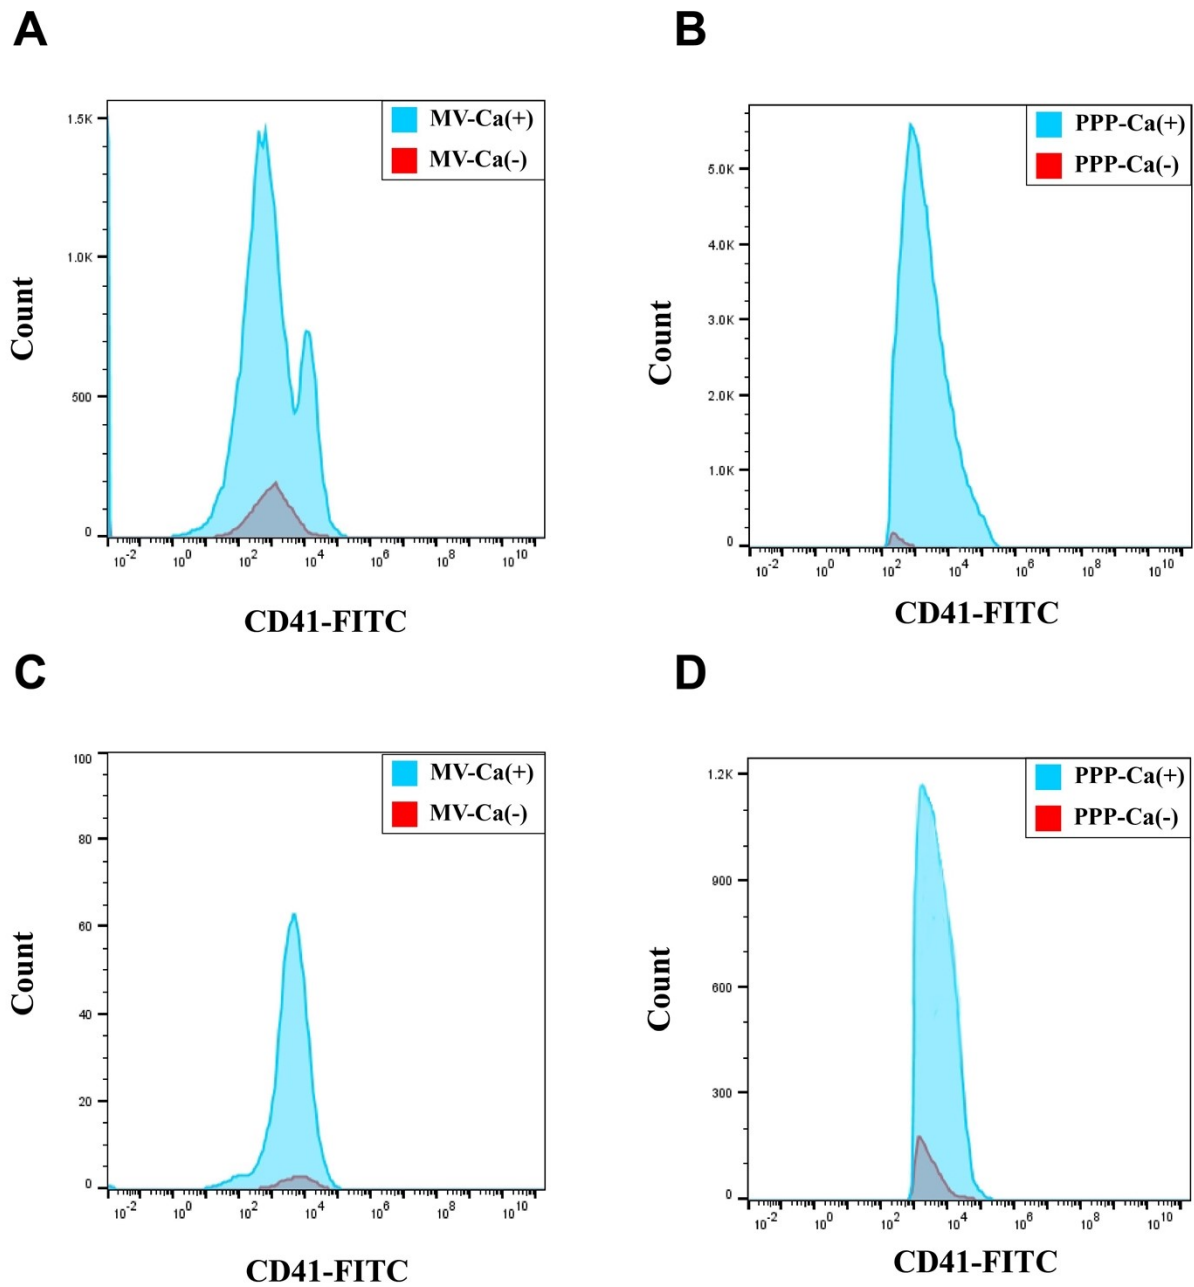

68

69 **Fig. S2** CD41a levels in platelet-poor plasma (PPP) and isolated microvesicles (MVs) before and  
 70 after calcium activation in patients with non-small cell lung cancer (NSCLC) (A, B) and healthy  
 71 donors (C, D). The data shown represent one of at least three independent experiments.

72

73

74

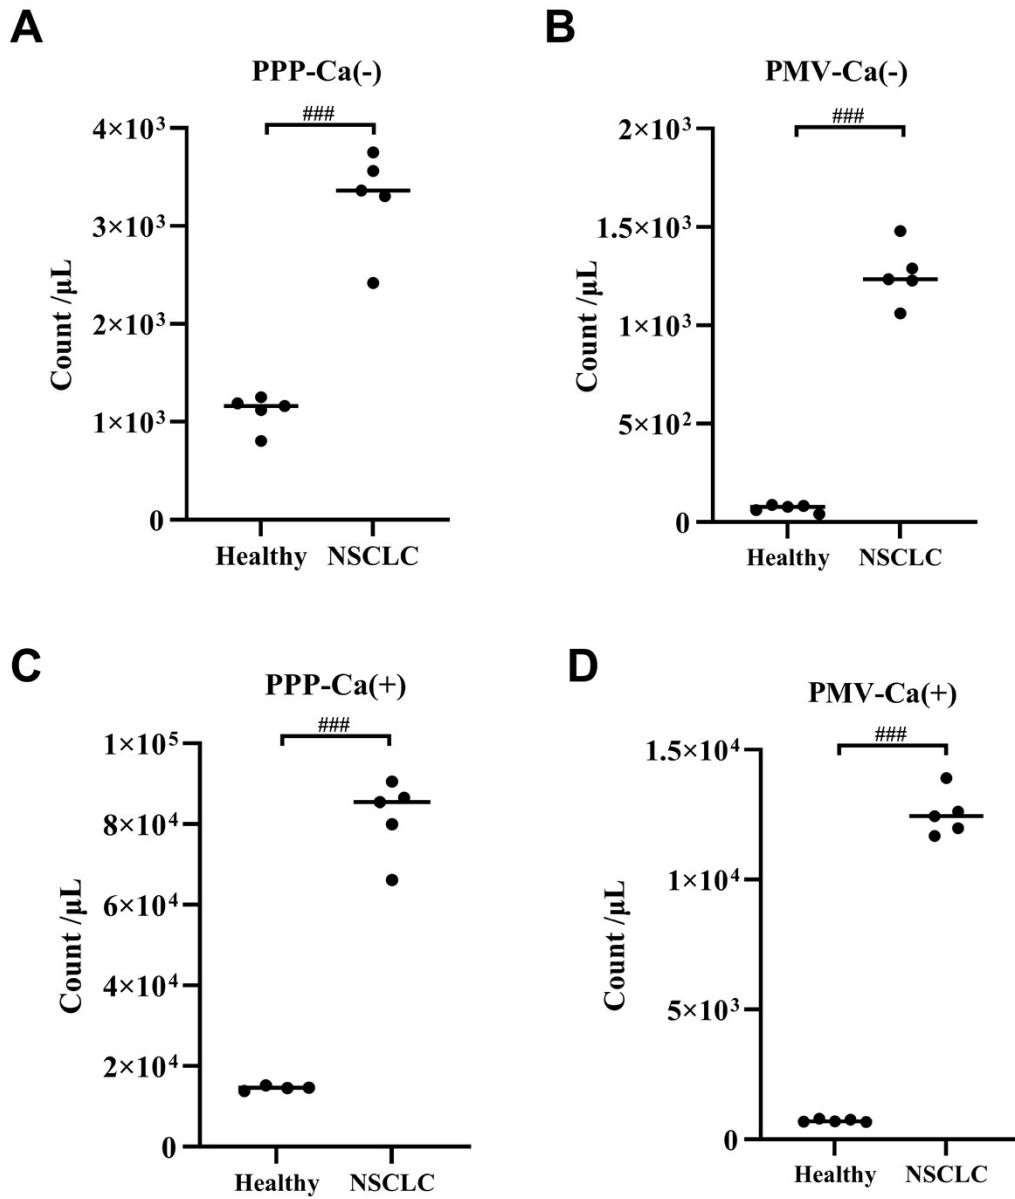

76

77 **Fig. S3** Comparison of CD41a levels in platelet-poor plasma (PPP) and isolated platelet-derived  
 78 microvesicles (PMVs) before (A, B) and after (C, D) calcium activation in healthy donors and  
 79 patients with non-small cell lung cancer (NSCLC). Data are expressed as mean  $\pm$  SD of five  
 80 replicate measurements for each donor in both healthy and unhealthy groups. ###  $p < 0.001$  (paired  
 81 t-test).

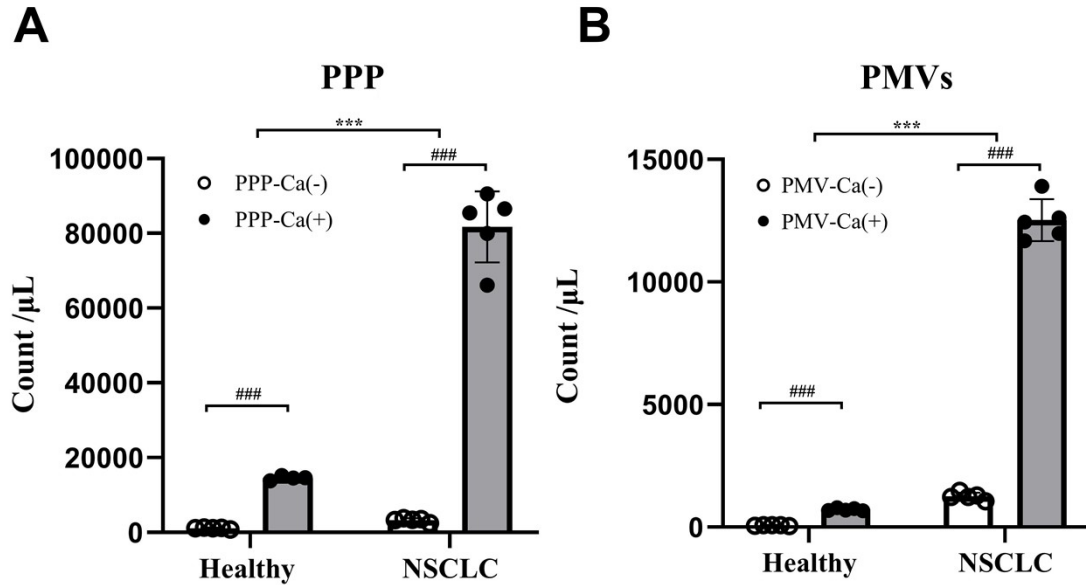

82  
83

84 **Fig. S4** Comparison of CD41a concentration levels in platelet-poor plasma (PPP) (A) and isolated  
85 microvesicles (MV)s (B) before and after calcium activation in healthy donors and patients with  
86 non-small cell lung cancer (NSCLC). Data are expressed as mean  $\pm$  SD of five replicate  
87 measurements for each donor in both healthy and unhealthy groups. \*\*\* p < 0.001 (One-Way  
88 ANOVA with Duncan's multiple comparisons test), ### p < 0.001 (paired t-test).

89  
90  
91

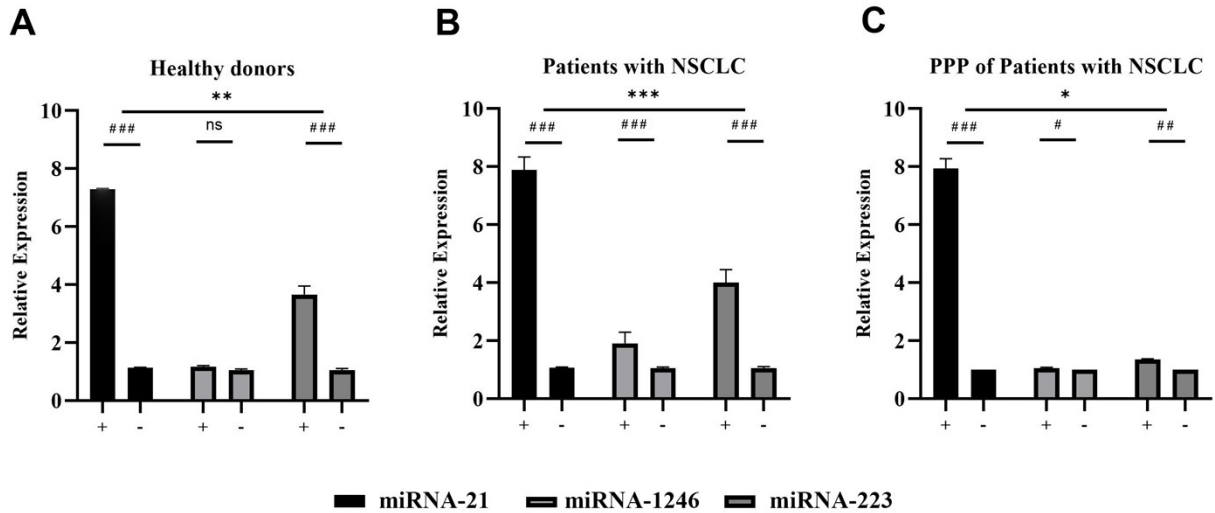

92

93 **Fig. S5** Effect of calcium treatment on miRNA expression in platelet-derived microvesicles  
 94 (PMVs) of healthy donors and NSCLC patients (A, B), and PPP of NSCLC patients (C). Data are  
 95 expressed as mean  $\pm$  SD of five independent experiments. \*  $p < 0.05$ , \*\*  $p < 0.01$ , \*\*\*  $p <$   
 96  $0.001$  (One-Way ANOVA with Duncan's multiple comparisons tests), ns: no significance,  
 97 #  $p < 0.05$ , ##  $p < 0.01$  ###  $p < 0.001$  (paired t-test).

98

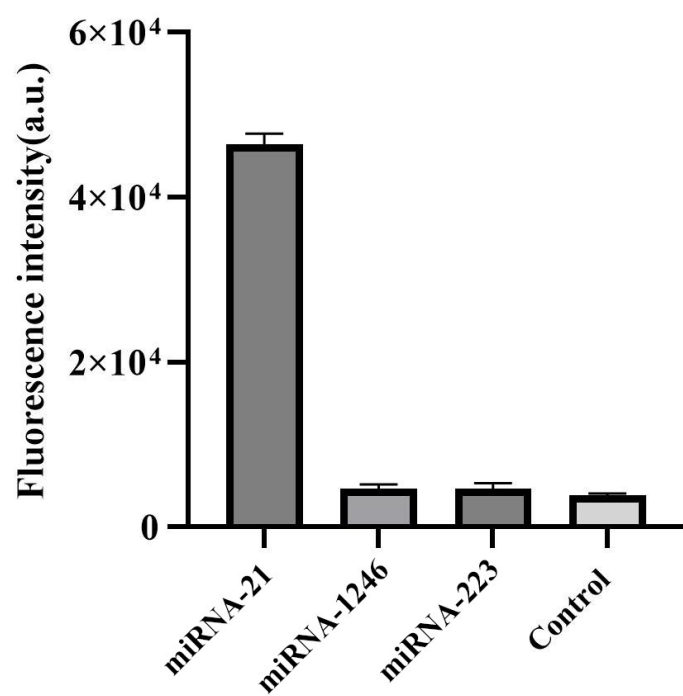

99

100 **Fig. S6** Test of specificity of the liposome-based assay for mi-RNA21 detection (10 ng/mL) in the  
101 presence of different miRNA sequences. The data are shown as the mean  $\pm$  SD (n = 3).
